# Supplementary material
Source: PubMed Central journal article supplement (PMC3383124)
Supplement: bi300642h_si_001.pdf [file bi300642h_si_001.pdf]

# Impact of N-terminal Acetylation of $\alpha$ -Synuclein on its Random Coil and Lipid Binding Properties<sup>†</sup>

Alexander S. Maltsev, Jinfu Ying, and Ad Bax

Laboratory of Chemical Physics, National Institute of Diabetes and Digestive and Kidney Diseases,

National Institutes of Health, Bethesda, Maryland 20892-0520

## **SUPPORTING INFORMATION**

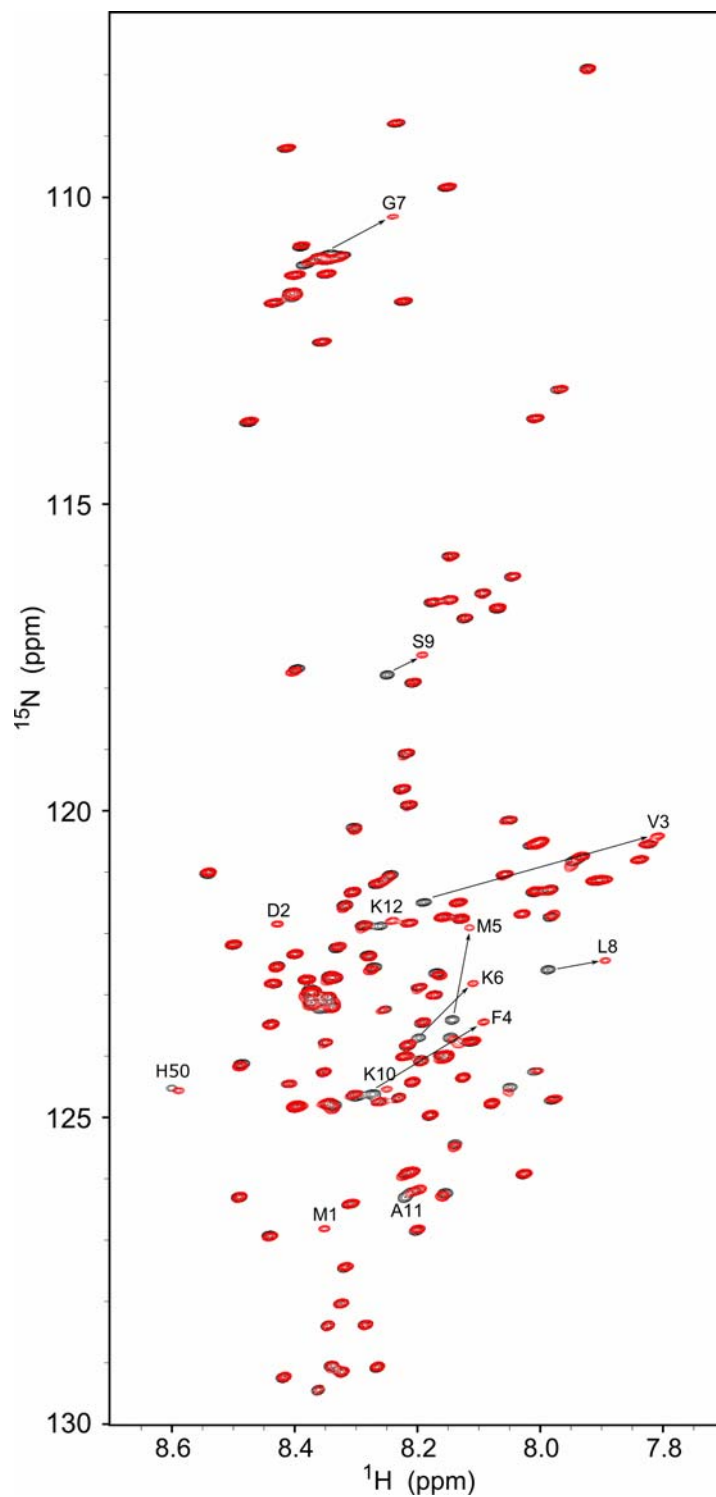

**Figure S1.** Overlay of 800-MHz TROSY-HSQC spectra of non-acetylated (black) and acetylated (red) aS, measured at 15 °C, pH 6. The prominent changes in peak positions for residues 3-9 are marked with arrows. Correlations for M1 and D2, which become observable in acetylated aS, are labeled, as are peaks for residues 10-12, which undergo small but detectable changes in chemical shifts. The very small difference in position of H50 results from a slightly higher pH (by ~0.1) of the acetylated aS sample. The unmarked A140 correlation (top right corner) is folded in the  $^{15}\text{N}$  dimension.

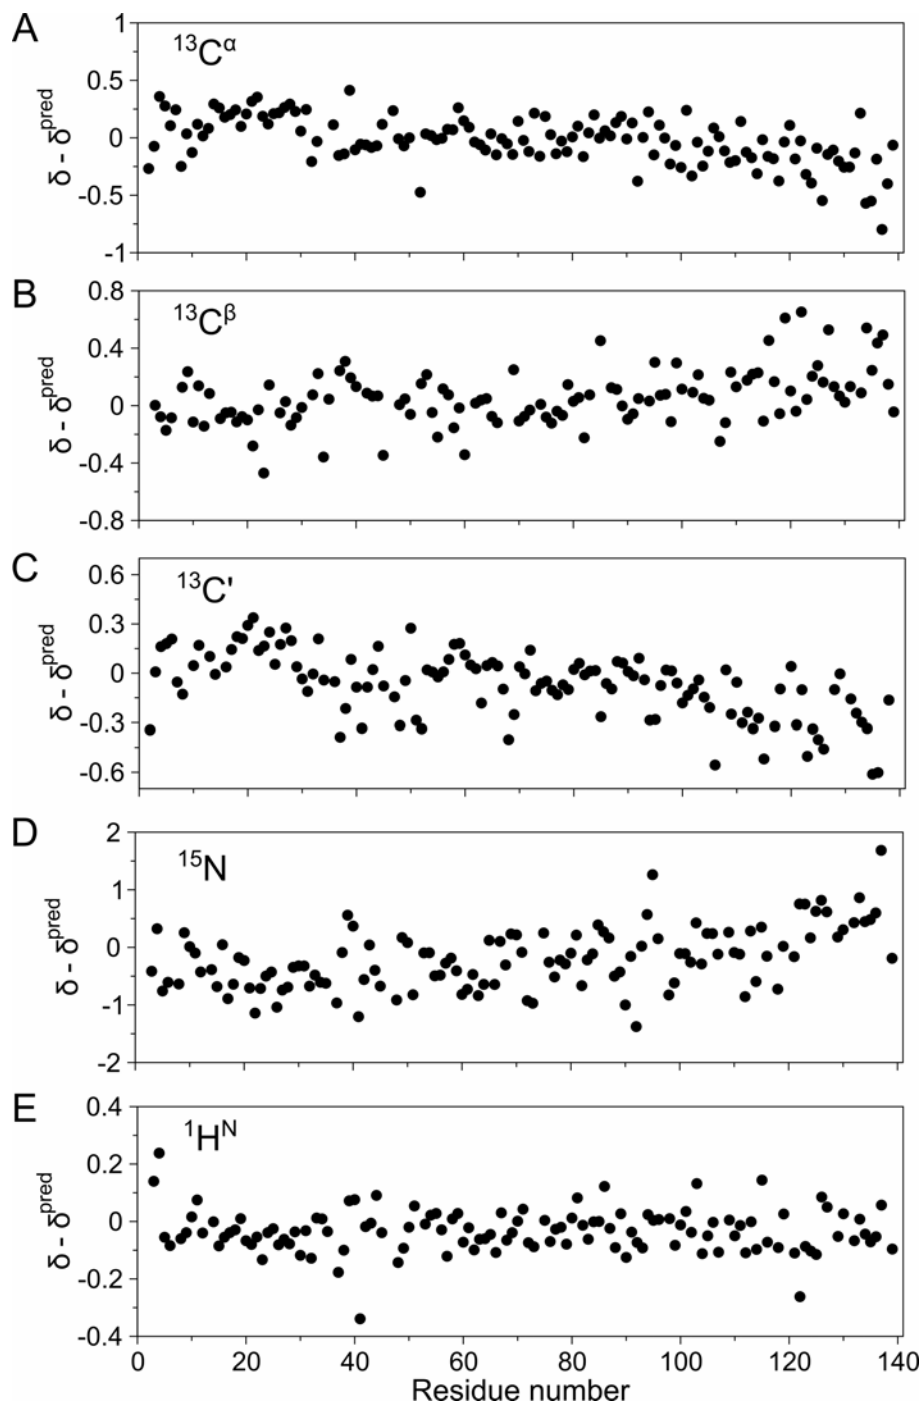

**Figure S2.** Differences between chemical shifts measured for non-acetylated aS and random coil values predicted based on Kjaergaard *et al.* (1) for non-acetylated aS at 15 °C and pH 6. Differences are shown for five nuclei: (A)  $^{13}\text{C}^\alpha$ , rmsd=0.21 ppm; (B)  $^{13}\text{C}^\beta$ , rmsd=0.20 ppm; (C)  $^{13}\text{C}'$ , rmsd=0.21 ppm; (D)  $^{15}\text{N}$ , rmsd=0.56 ppm; (E)  $^1\text{H}^\text{N}$ , rmsd=0.08 ppm.

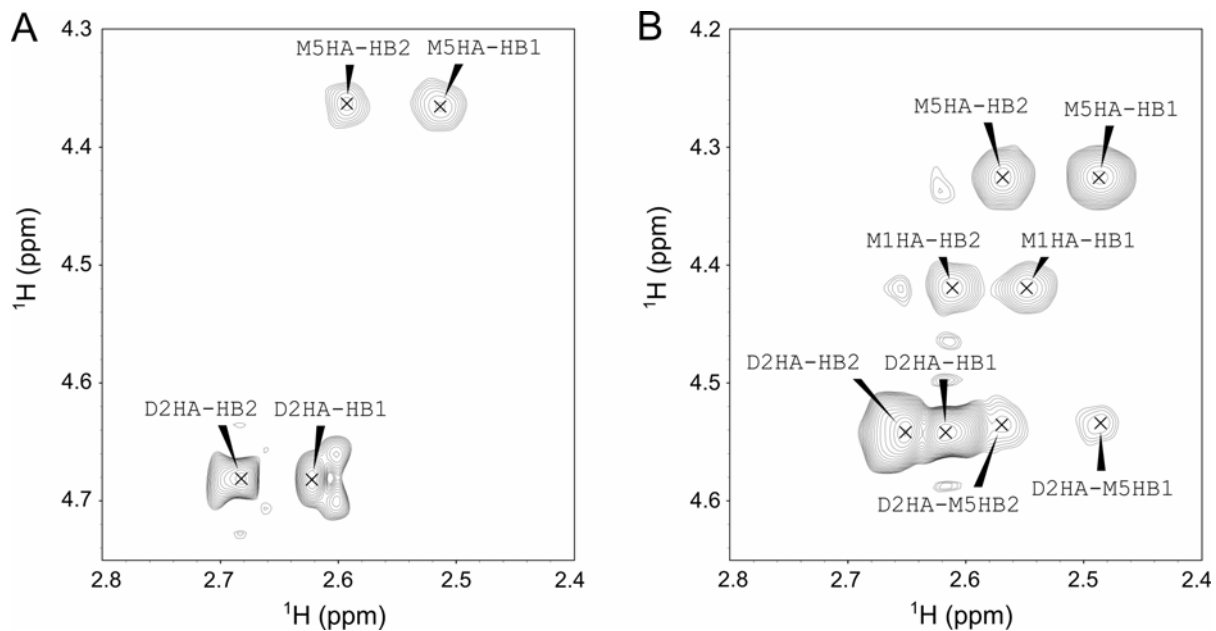

**Figure S3.** Comparison of small expanded regions of the 900 MHz 2D NOESY spectra of non-acetylated (A) and acetylated (B) 15-residue N-terminal fragment of aS. NOE cross-peaks between  $\text{H}^{\alpha}$  of Asp2 and  $\text{H}^{\beta}$  protons of Met5 are easily observable for the acetylated peptide, but are absent for the non-acetylated peptide.

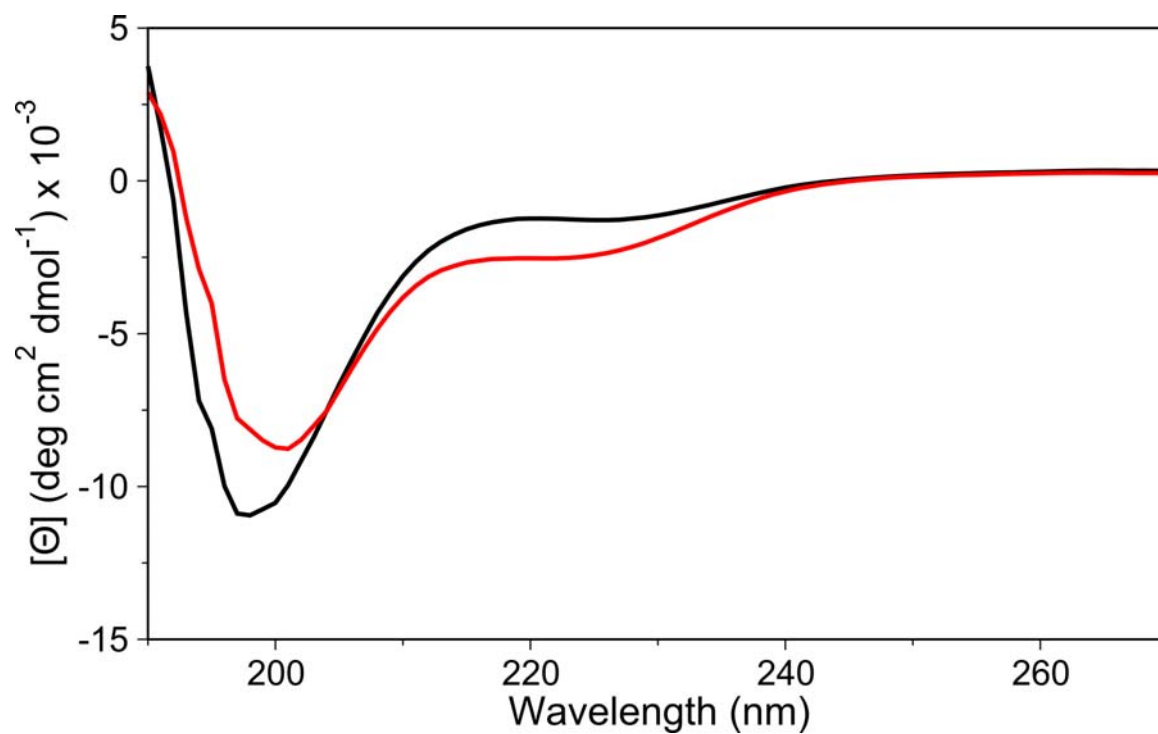

**Figure S4.** CD spectra of non-acetylated (black) and acetylated (red) 15-residue peptides. The peptide sequences match the first 15 residues of human wild type  $\alpha$ S. Both peptides were C-terminally amidated. Spectra were acquired at pH 6, 20 °C, at 100  $\mu$ M peptide concentration, using a 1 mm path-length cuvette.

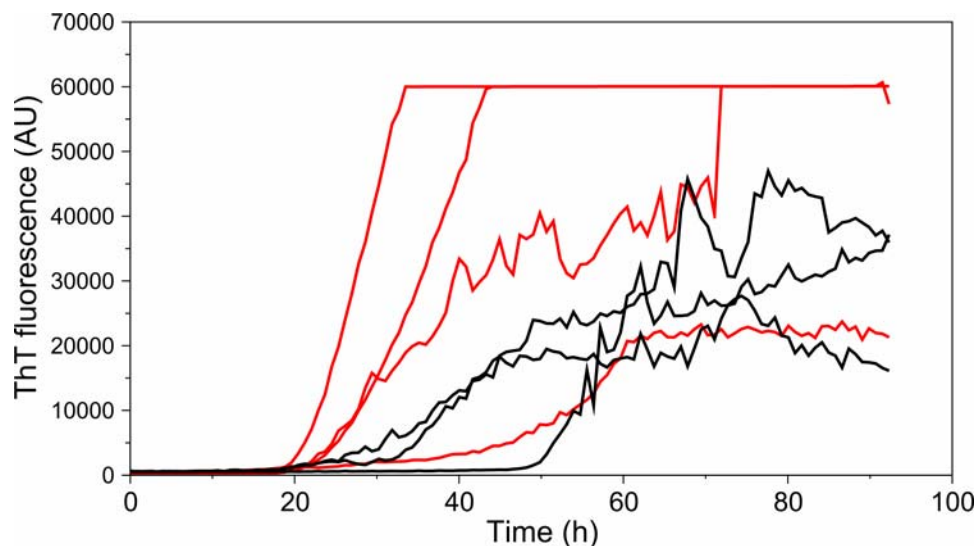

**Figure S5.** Results of aS fibrillation experiments. Changes in Thioflavin T fluorescence as a function of time are shown for non-acetylated (black) and acetylated (red) WT aS. Each trace represents measurements performed on a single well. Some of the samples reached fluorescence that was higher than the overflow limit of 60,000 AU, and the values of overflowed measurements are truncated to 60,000. Sample conditions were carefully controlled to be identical: 1x PBS pH 7.4, 200  $\mu$ M protein, 10  $\mu$ M ThT. Both acetylated and non-acetylated aS were prepared using identical purification protocols, including the high temperature denaturation step. The protein solutions were filtered through 100 kDa Amicon centrifugal filters to remove possible aggregated species prior to the fibrillation experiments.

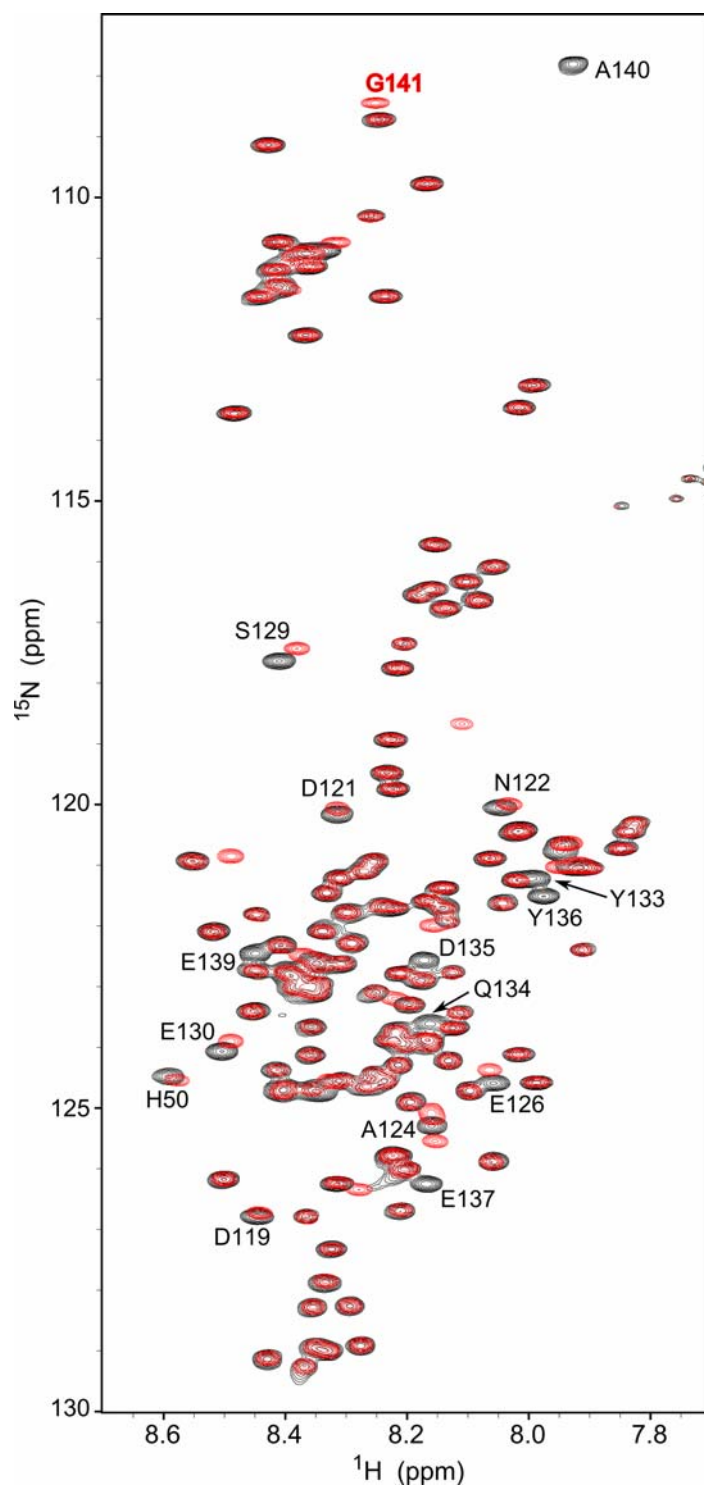

**Figure S6.** Overlay of 500-MHz TROSY-HSQC spectra of acetylated wild type aS (black) and acetylated His-tagged aS (red). Peaks undergoing significant chemical shift changes are labeled. Note that G141 only exists in the His-tagged aS. Both spectra were recorded in PBS buffer, 5% glycerol, 0.05% BOG, with the pH adjusted to 6. The small difference in position for the H50 correlation results from a very small increase in pH (by  $\sim 0.12$ ) over the wild type sample. Note that the A140 resonance is folded in the  $^{15}\text{N}$  dimension.

**Table S1.** Chemical shifts measured for non-acetylated WT aS at 15 °C and pH 6. Grayed out values have lower precision due to partial overlap.

| Residue | $^{13}\text{C}^\alpha$ | $^{13}\text{C}^\beta$ | $^{13}\text{C}'$ | $^{15}\text{N}$ | $^1\text{H}^{\text{N}}$ |
|---------|------------------------|-----------------------|------------------|-----------------|-------------------------|
| D2      | 54.217                 | 41.566                | 175.795          | —               | —                       |
| V3      | 62.547                 | 32.672                | 175.890          | 120.545         | 8.292                   |
| F4      | 57.936                 | 39.231                | 175.810          | 123.651         | 8.378                   |
| M5      | 55.365                 | 32.702                | 175.908          | 122.473         | 8.244                   |
| K6      | 56.921                 | 32.840                | 177.128          | 122.742         | 8.299                   |
| G7      | 45.313                 | —                     | 174.144          | 109.915         | 8.446                   |
| L8      | 55.155                 | 42.543                | 177.635          | 121.620         | 8.090                   |
| S9      | 58.389                 | 63.779                | 174.559          | 116.829         | 8.352                   |
| K10     | 56.241                 | 33.009                | 176.442          | 123.704         | 8.400                   |
| A11     | 52.661                 | 19.181                | 177.894          | 125.390         | 8.327                   |
| K12     | 56.450                 | 32.959                | 176.679          | 120.929         | 8.368                   |
| E13     | 56.838                 | 30.293                | 177.021          | 122.300         | 8.462                   |
| G14     | 45.319                 | —                     | 174.014          | 110.143         | 8.489                   |
| V15     | 62.571                 | 32.724                | 176.465          | 120.152         | 8.009                   |
| V16     | 62.411                 | 32.694                | 175.986          | 125.313         | 8.314                   |
| A17     | 52.542                 | 19.129                | 177.653          | 128.587         | 8.471                   |
| A18     | 52.701                 | 19.087                | 177.896          | 123.773         | 8.340                   |
| A19     | 52.739                 | 19.091                | 178.184          | 123.163         | 8.305                   |
| E20     | 56.777                 | 30.191                | 176.937          | 120.161         | 8.357                   |
| K21     | 56.732                 | 32.868                | 177.148          | 122.341         | 8.370                   |
| T22     | 62.282                 | 69.810                | 174.691          | 115.247         | 8.151                   |
| K23     | 56.657                 | 32.909                | 176.672          | 123.809         | 8.372                   |
| Q24     | 56.189                 | 29.488                | 176.589          | 121.785         | 8.449                   |
| G25     | 45.359                 | —                     | 174.242          | 110.615         | 8.513                   |
| V26     | 62.590                 | 32.739                | 176.369          | 119.772         | 8.041                   |
| A27     | 52.818                 | 19.011                | 178.116          | 127.482         | 8.453                   |
| E28     | 56.838                 | 30.180                | 176.665          | 120.637         | 8.426                   |
| A29     | 52.710                 | 19.064                | 177.751          | 125.000         | 8.328                   |
| A30     | 52.843                 | 19.061                | 178.482          | 123.081         | 8.260                   |
| G31     | 45.372                 | —                     | 174.220          | 107.818         | 8.341                   |
| K32     | 56.251                 | 33.201                | 177.017          | 120.720         | 8.137                   |
| T33     | 61.925                 | 69.997                | 174.677          | 115.619         | 8.252                   |
| K34     | 56.515                 | 32.925                | 176.530          | 123.882         | 8.502                   |
| E35     | 56.837                 | 30.223                | 176.948          | 122.221         | 8.477                   |
| G36     | 45.317                 | —                     | 174.016          | 110.030         | 8.470                   |
| V37     | 62.341                 | 32.746                | 175.924          | 119.591         | 7.930                   |
| L38     | 54.986                 | 42.505                | 176.658          | 125.856         | 8.304                   |



**Table S1** (continued)

| Residue | $^{13}\text{C}^\alpha$ | $^{13}\text{C}^\beta$ | $^{13}\text{C}'$ | $^{15}\text{N}$ | $^1\text{H}^\text{N}$ |
|---------|------------------------|-----------------------|------------------|-----------------|-----------------------|
| Y39     | 57.881                 | 38.825                | 175.586          | 122.511         | 8.298                 |
| V40     | 62.202                 | 32.830                | 176.156          | 123.347         | 8.104                 |
| G41     | 45.178                 | —                     | 173.956          | 112.182         | 8.072                 |
| S42     | 58.367                 | 63.908                | 174.794          | 115.628         | 8.281                 |
| K43     | 56.446                 | 33.008                | 176.879          | 123.496         | 8.515                 |
| T44     | 61.900                 | 69.914                | 174.587          | 115.529         | 8.198                 |
| K45     | 56.574                 | 32.937                | 176.494          | 123.814         | 8.454                 |
| E46     | 56.823                 | 30.161                | 176.938          | 122.013         | 8.479                 |
| G47     | 45.261                 | —                     | 173.877          | 110.030         | 8.450                 |
| V48     | 62.273                 | 32.792                | 176.082          | 119.851         | 7.944                 |
| V49     | 62.225                 | 32.732                | 175.924          | 124.953         | 8.316                 |
| H50     | 55.392                 | 29.375                | 174.946          | 123.667         | 8.694                 |
| G51     | 45.167                 | —                     | 173.731          | 110.652         | 8.501                 |
| V52     | 62.006                 | 32.972                | 175.928          | 119.565         | 8.122                 |
| A53     | 52.426                 | 19.300                | 177.822          | 128.308         | 8.522                 |
| T54     | 61.835                 | 69.985                | 174.544          | 114.919         | 8.253                 |
| V55     | 62.303                 | 32.856                | 175.852          | 123.073         | 8.268                 |
| A56     | 52.543                 | 19.210                | 177.778          | 128.159         | 8.446                 |
| E57     | 56.627                 | 30.385                | 176.708          | 120.957         | 8.396                 |
| K58     | 56.485                 | 32.995                | 176.986          | 122.860         | 8.459                 |
| T59     | 62.164                 | 69.821                | 174.648          | 116.000         | 8.233                 |
| K60     | 56.664                 | 32.952                | 176.691          | 123.694         | 8.414                 |
| E61     | 56.758                 | 30.144                | 176.428          | 122.159         | 8.458                 |
| Q62     | 55.790                 | 29.512                | 175.963          | 121.805         | 8.446                 |
| V63     | 62.416                 | 32.794                | 176.349          | 121.955         | 8.303                 |
| T64     | 61.784                 | 69.910                | 174.055          | 118.161         | 8.325                 |
| N65     | 53.120                 | 38.906                | 175.243          | 121.864         | 8.542                 |
| V66     | 62.678                 | 32.509                | 176.863          | 120.790         | 8.262                 |
| G67     | 45.355                 | —                     | 174.666          | 112.689         | 8.578                 |
| G68     | 45.043                 | —                     | 173.733          | 108.857         | 8.256                 |
| A69     | 52.311                 | 19.336                | 177.655          | 123.811         | 8.185                 |
| V70     | 62.426                 | 32.713                | 176.334          | 120.557         | 8.236                 |
| V71     | 62.172                 | 32.771                | 176.289          | 125.477         | 8.415                 |
| T72     | 61.847                 | 69.918                | 174.908          | 118.724         | 8.333                 |
| G73     | 45.252                 | —                     | 174.010          | 111.393         | 8.459                 |
| V74     | 62.348                 | 32.849                | 176.559          | 119.540         | 8.105                 |
| T75     | 61.935                 | 69.803                | 174.079          | 119.004         | 8.323                 |

**Table S1** (continued)

| Residue | $^{13}\text{C}^\alpha$ | $^{13}\text{C}^\beta$ | $^{13}\text{C}'$ | $^{15}\text{N}$ | $^1\text{H}^\text{N}$ |
|---------|------------------------|-----------------------|------------------|-----------------|-----------------------|
| A76     | 52.440                 | 19.288                | 177.560          | 127.449         | 8.391                 |
| V77     | 62.225                 | 32.826                | 176.009          | 120.129         | 8.165                 |
| A78     | 52.488                 | 19.152                | 177.629          | 128.235         | 8.431                 |
| Q79     | 55.702                 | 29.622                | 175.939          | 120.385         | 8.414                 |
| K80     | 56.367                 | 33.158                | 176.678          | 123.334         | 8.459                 |
| T81     | 61.903                 | 69.934                | 174.441          | 117.009         | 8.317                 |
| V82     | 62.305                 | 32.820                | 176.144          | 123.063         | 8.327                 |
| E83     | 56.800                 | 30.217                | 177.026          | 125.387         | 8.597                 |
| G84     | 45.288                 | —                     | 174.141          | 110.759         | 8.541                 |
| A85     | 52.871                 | 19.203                | 178.490          | 124.002         | 8.284                 |
| G86     | 45.296                 | —                     | 174.298          | 108.226         | 8.516                 |
| S87     | 58.341                 | 63.894                | 174.716          | 115.712         | 8.178                 |
| I88     | 61.314                 | 38.672                | 176.263          | 122.793         | 8.212                 |
| A89     | 52.604                 | 19.067                | 177.557          | 128.132         | 8.370                 |
| A90     | 52.473                 | 19.167                | 177.725          | 123.390         | 8.231                 |
| A91     | 52.639                 | 19.119                | 178.132          | 123.460         | 8.313                 |
| T92     | 62.004                 | 69.870                | 175.155          | 112.642         | 8.115                 |
| G93     | 45.194                 | —                     | 173.617          | 110.721         | 8.328                 |
| F94     | 57.794                 | 39.590                | 175.473          | 120.360         | 8.113                 |
| V95     | 62.006                 | 33.113                | 175.393          | 123.773         | 8.075                 |
| K96     | 56.370                 | 33.044                | 176.440          | 126.496         | 8.422                 |
| K97     | 56.495                 | 33.196                | 176.350          | 123.793         | 8.503                 |
| D98     | 54.420                 | 41.025                | 176.209          | 121.254         | 8.434                 |
| Q99     | 55.867                 | 29.392                | 176.013          | 120.204         | 8.367                 |
| L100    | 55.378                 | 42.220                | 177.985          | 122.852         | 8.321                 |
| G101    | 45.312                 | —                     | 174.066          | 109.833         | 8.493                 |
| K102    | 56.200                 | 33.150                | 176.450          | 120.794         | 8.235                 |
| N103    | 53.353                 | 38.765                | 175.314          | 120.049         | 8.646                 |
| E104    | 56.681                 | 30.150                | 176.539          | 121.373         | 8.504                 |
| E105    | 56.866                 | 30.099                | 177.015          | 121.813         | 8.486                 |
| G106    | 45.044                 | —                     | 173.434          | 110.271         | 8.453                 |
| A107    | 50.500                 | 18.172                | —                | 124.960         | 8.131                 |
| P108    | 63.093                 | 32.043                | 177.048          | —               | —                     |
| Q109    | 55.713                 | 29.644                | 175.970          | 121.207         | 8.605                 |
| E110    | 56.627                 | 30.399                | 176.819          | 122.516         | 8.543                 |
| G111    | 45.270                 | —                     | 173.753          | 110.289         | 8.505                 |
| I112    | 60.918                 | 38.657                | 176.237          | 120.161         | 8.010                 |

**Table S1** (continued)

| Residue | $^{13}\text{C}^\alpha$ | $^{13}\text{C}^\beta$ | $^{13}\text{C}'$ | $^{15}\text{N}$ | $^1\text{H}^\text{N}$ |
|---------|------------------------|-----------------------|------------------|-----------------|-----------------------|
| L113    | 55.015                 | 42.356                | 177.138          | 127.052         | 8.428                 |
| E114    | 56.398                 | 30.446                | 175.837          | 122.240         | 8.441                 |
| D115    | 54.212                 | 41.036                | 175.721          | 121.385         | 8.383                 |
| M116    | 53.193                 | 32.482                | —                | 122.021         | 8.270                 |
| P117    | 62.896                 | 32.128                | 176.698          | —               | —                     |
| V118    | 61.950                 | 33.054                | 175.755          | 120.876         | 8.317                 |
| D119    | 52.058                 | 41.014                | —                | 125.960         | 8.541                 |
| P120    | 63.497                 | 32.193                | 176.920          | —               | —                     |
| D121    | 54.495                 | 40.787                | 176.110          | 119.290         | 8.405                 |
| N122    | 53.465                 | 39.270                | 175.370          | 119.167         | 8.149                 |
| E123    | 56.747                 | 29.904                | 176.026          | 121.643         | 8.384                 |
| A124    | 52.366                 | 19.131                | 177.208          | 124.463         | 8.246                 |
| Y125    | 57.749                 | 38.976                | 175.351          | 119.929         | 8.048                 |
| E126    | 55.608                 | 30.549                | 175.415          | 123.668         | 8.150                 |
| M127    | 53.302                 | 32.354                | —                | 123.866         | 8.437                 |
| P128    | 63.059                 | 32.205                | 176.890          | —               | —                     |
| S129    | 58.277                 | 63.901                | 174.807          | 116.742         | 8.503                 |
| E130    | 56.467                 | 30.188                | 176.493          | 123.177         | 8.591                 |
| E131    | 56.848                 | 30.155                | 176.924          | 121.925         | 8.486                 |
| G132    | 45.185                 | —                     | 173.818          | 110.009         | 8.429                 |
| Y133    | 58.127                 | 38.788                | 175.721          | 120.346         | 8.088                 |
| Q134    | 55.406                 | 29.840                | 174.840          | 122.806         | 8.247                 |
| D135    | 54.141                 | 41.017                | 175.442          | 121.693         | 8.267                 |
| Y136    | 57.599                 | 39.068                | 175.074          | 120.732         | 8.082                 |
| E137    | 53.509                 | 30.010                | —                | 125.328         | 8.263                 |
| P138    | 62.914                 | 32.222                | 176.853          | —               | —                     |
| E139    | 56.509                 | 30.197                | 175.365          | 121.586         | 8.535                 |
| A140    | 53.797                 | 20.174                | —                | 130.919         | 8.023                 |

**Table S2.** Chemical shifts measured for acetylated WT aS at 15 °C and pH 6. Grayed out values have lower precision due to partial overlap.

| Residue | $^{13}\text{C}^\alpha$ | $^{13}\text{C}^\beta$ | $^{13}\text{C}'$ | $^{15}\text{N}$ | $^1\text{H}^N$ |
|---------|------------------------|-----------------------|------------------|-----------------|----------------|
| M1      | 55.899                 | 32.891                | 176.594          | 125.850         | 8.456          |
| D2      | 54.554                 | 40.805                | 176.718          | 120.888         | 8.533          |
| V3      | 63.276                 | 32.325                | 176.554          | 119.444         | 7.913          |
| F4      | 58.518                 | 39.078                | 176.352          | 122.491         | 8.199          |
| M5      | 55.774                 | 32.399                | 176.495          | 120.956         | 8.220          |
| K6      | 57.141                 | 32.744                | 177.383          | 121.863         | 8.215          |
| G7      | 45.454                 | —                     | 174.351          | 109.357         | 8.346          |
| L8      | 55.281                 | 42.468                | 177.727          | 121.480         | 8.000          |
| S9      | 58.521                 | 63.731                | 174.652          | 116.494         | 8.298          |
| K10     | 56.295                 | 32.958                | 176.503          | 123.576         | 8.354          |
| A11     | 52.716                 | 19.137                | 177.954          | 125.209         | 8.298          |
| K12     | 56.480                 | 32.947                | 176.680          | 120.825         | 8.346          |
| E13     | 56.847                 | 30.220                | 177.043          | 122.177         | 8.463          |
| G14     | 45.287                 | —                     | 174.034          | 110.082         | 8.486          |
| V15     | 62.605                 | 32.719                | 176.464          | 120.157         | 8.004          |
| V16     | 62.461                 | 32.690                | 176.009          | 125.254         | 8.313          |
| A17     | 52.563                 | 19.121                | 177.676          | 128.488         | 8.466          |
| A18     | 52.719                 | 19.081                | 177.910          | 123.750         | 8.334          |
| A19     | 52.747                 | 19.092                | 178.193          | 123.140         | 8.302          |
| E20     | 56.788                 | 30.185                | 176.946          | 120.134         | 8.354          |
| K21     | 56.746                 | 32.867                | 177.156          | 122.307         | 8.364          |
| T22     | 62.290                 | 69.811                | 174.694          | 115.220         | 8.150          |
| K23     | 56.669                 | 32.904                | 176.682          | 123.799         | 8.369          |
| Q24     | 56.200                 | 29.489                | 176.593          | 121.751         | 8.449          |
| G25     | 45.365                 | —                     | 174.248          | 110.591         | 8.511          |
| V26     | 62.596                 | 32.735                | 176.368          | 119.774         | 8.041          |
| A27     | 52.821                 | 19.012                | 178.125          | 127.455         | 8.452          |
| E28     | 56.848                 | 30.179                | 176.662          | 120.617         | 8.425          |
| A29     | 52.715                 | 19.067                | 177.748          | 124.997         | 8.329          |
| A30     | 52.833                 | 19.065                | 178.476          | 123.080         | 8.260          |
| G31     | 45.370                 | —                     | 174.217          | 107.817         | 8.340          |
| K32     | 56.250                 | 33.200                | 177.013          | 120.721         | 8.135          |
| T33     | 61.920                 | 70.000                | 174.673          | 115.603         | 8.251          |
| K34     | 56.515                 | 32.935                | 176.529          | 123.882         | 8.502          |
| E35     | 56.815                 | 30.209                | 176.948          | 122.204         | 8.478          |
| G36     | 45.319                 | —                     | 174.014          | 110.030         | 8.470          |
| V37     | 62.341                 | 32.745                | 175.924          | 119.576         | 7.931          |
| L38     | 54.989                 | 42.495                | 176.656          | 125.856         | 8.304          |

**Table S2** (continued)

| Residue | $^{13}\text{C}^\alpha$ | $^{13}\text{C}^\beta$ | $^{13}\text{C}'$ | $^{15}\text{N}$ | $^1\text{H}^N$ |
|---------|------------------------|-----------------------|------------------|-----------------|----------------|
| Y39     | 57.881                 | 38.835                | 175.583          | 122.486         | 8.295          |
| V40     | 62.201                 | 32.828                | 176.154          | 123.347         | 8.104          |
| G41     | 45.177                 | —                     | 173.959          | 112.164         | 8.071          |
| S42     | 58.373                 | 63.909                | 174.791          | 115.626         | 8.278          |
| K43     | 56.454                 | 33.004                | 176.877          | 123.493         | 8.512          |
| T44     | 61.900                 | 69.913                | 174.592          | 115.501         | 8.197          |
| K45     | 56.585                 | 32.941                | 176.489          | 123.809         | 8.452          |
| E46     | 56.856                 | 30.215                | 176.938          | 122.013         | 8.479          |
| G47     | 45.263                 | —                     | 173.876          | 110.030         | 8.450          |
| V48     | 62.274                 | 32.789                | 176.086          | 119.829         | 7.945          |
| V49     | 62.247                 | 32.746                | 175.920          | 124.933         | 8.314          |
| H50     | 55.392                 | 29.374                | 174.938          | 123.622         | 8.694          |
| G51     | 45.167                 | —                     | 173.726          | 110.657         | 8.503          |
| V52     | 62.013                 | 32.972                | 175.925          | 119.565         | 8.122          |
| A53     | 52.427                 | 19.300                | 177.820          | 128.293         | 8.522          |
| T54     | 61.835                 | 69.987                | 174.542          | 114.912         | 8.252          |
| V55     | 62.308                 | 32.858                | 175.853          | 123.070         | 8.268          |
| A56     | 52.544                 | 19.212                | 177.777          | 128.149         | 8.444          |
| E57     | 56.625                 | 30.382                | 176.707          | 120.954         | 8.396          |
| K58     | 56.476                 | 32.998                | 176.982          | 122.860         | 8.459          |
| T59     | 62.162                 | 69.823                | 174.649          | 115.963         | 8.232          |
| K60     | 56.664                 | 32.952                | 176.692          | 123.699         | 8.413          |
| E61     | 56.745                 | 30.163                | 176.424          | 122.123         | 8.454          |
| Q62     | 55.789                 | 29.516                | 175.958          | 121.864         | 8.447          |
| V63     | 62.415                 | 32.791                | 176.346          | 121.960         | 8.306          |
| T64     | 61.780                 | 69.913                | 174.051          | 118.146         | 8.326          |
| N65     | 53.122                 | 38.909                | 175.240          | 121.862         | 8.542          |
| V66     | 62.678                 | 32.508                | 176.861          | 120.771         | 8.264          |
| G67     | 45.354                 | —                     | 174.664          | 112.667         | 8.579          |
| G68     | 45.035                 | —                     | 173.730          | 108.860         | 8.256          |
| A69     | 52.311                 | 19.337                | 177.653          | 123.812         | 8.186          |
| V70     | 62.424                 | 32.715                | 176.332          | 120.541         | 8.239          |
| V71     | 62.170                 | 32.780                | 176.288          | 125.458         | 8.415          |
| T72     | 61.847                 | 69.920                | 174.906          | 118.702         | 8.331          |
| G73     | 45.252                 | —                     | 174.010          | 111.391         | 8.459          |
| V74     | 62.341                 | 32.845                | 176.557          | 119.540         | 8.105          |
| T75     | 61.931                 | 69.807                | 174.077          | 118.974         | 8.322          |

**Table S2** (continued)

| Residue | $^{13}\text{C}^\alpha$ | $^{13}\text{C}^\beta$ | $^{13}\text{C}'$ | $^{15}\text{N}$ | $^1\text{H}^N$ |
|---------|------------------------|-----------------------|------------------|-----------------|----------------|
| A76     | 52.443                 | 19.290                | 177.559          | 127.445         | 8.391          |
| V77     | 62.230                 | 32.827                | 176.008          | 120.104         | 8.165          |
| A78     | 52.487                 | 19.148                | 177.628          | 128.207         | 8.431          |
| Q79     | 55.703                 | 29.622                | 175.939          | 120.377         | 8.413          |
| K80     | 56.370                 | 33.158                | 176.677          | 123.322         | 8.459          |
| T81     | 61.900                 | 69.935                | 174.438          | 116.970         | 8.314          |
| V82     | 62.303                 | 32.819                | 176.142          | 123.070         | 8.330          |
| E83     | 56.798                 | 30.219                | 177.023          | 125.366         | 8.597          |
| G84     | 45.287                 | —                     | 174.138          | 110.771         | 8.541          |
| A85     | 52.871                 | 19.200                | 178.491          | 124.001         | 8.285          |
| G86     | 45.297                 | —                     | 174.298          | 108.232         | 8.517          |
| S87     | 58.351                 | 63.896                | 174.714          | 115.718         | 8.176          |
| I88     | 61.310                 | 38.674                | 176.260          | 122.788         | 8.216          |
| A89     | 52.604                 | 19.065                | 177.554          | 128.117         | 8.370          |
| A90     | 52.472                 | 19.169                | 177.723          | 123.394         | 8.231          |
| A91     | 52.635                 | 19.125                | 178.130          | 123.463         | 8.314          |
| T92     | 61.999                 | 69.872                | 175.153          | 112.655         | 8.113          |
| G93     | 45.193                 | —                     | 173.613          | 110.724         | 8.328          |
| F94     | 57.798                 | 39.619                | 175.472          | 120.338         | 8.111          |
| V95     | 62.003                 | 33.114                | 175.392          | 123.748         | 8.081          |
| K96     | 56.371                 | 33.024                | 176.444          | 126.474         | 8.421          |
| K97     | 56.488                 | 33.190                | 176.352          | 123.793         | 8.503          |
| D98     | 54.424                 | 41.025                | 176.206          | 121.250         | 8.433          |
| Q99     | 55.862                 | 29.394                | 176.014          | 120.214         | 8.368          |
| L100    | 55.384                 | 42.222                | 177.985          | 122.852         | 8.318          |
| G101    | 45.310                 | —                     | 174.070          | 109.814         | 8.495          |
| K102    | 56.203                 | 33.152                | 176.451          | 120.793         | 8.234          |
| N103    | 53.347                 | 38.768                | 175.310          | 120.035         | 8.645          |
| E104    | 56.676                 | 30.150                | 176.539          | 121.386         | 8.505          |
| E105    | 56.862                 | 30.105                | 177.013          | 121.813         | 8.486          |
| G106    | 45.040                 | —                     | 173.432          | 110.272         | 8.453          |
| A107    | 50.498                 | 18.174                | —                | 124.964         | 8.135          |
| P108    | 63.090                 | 32.046                | 177.047          | —               | —              |
| Q109    | 55.714                 | 29.637                | 175.972          | 121.207         | 8.606          |
| E110    | 56.625                 | 30.405                | 176.821          | 122.524         | 8.543          |
| G111    | 45.273                 | —                     | 173.756          | 110.295         | 8.505          |
| I112    | 60.918                 | 38.658                | 176.239          | 120.166         | 8.013          |

**Table S2** (continued)

| Residue | $^{13}\text{C}^\alpha$ | $^{13}\text{C}^\beta$ | $^{13}\text{C}'$ | $^{15}\text{N}$ | $^1\text{H}^N$ |
|---------|------------------------|-----------------------|------------------|-----------------|----------------|
| L113    | 55.010                 | 42.353                | 177.136          | 127.053         | 8.428          |
| E114    | 56.395                 | 30.445                | 175.840          | 122.239         | 8.442          |
| D115    | 54.214                 | 41.047                | 175.723          | 121.394         | 8.383          |
| M116    | 53.190                 | 32.477                | —                | 122.040         | 8.277          |
| P117    | 62.898                 | 32.125                | 176.701          | —               | —              |
| V118    | 61.937                 | 33.057                | 175.758          | 120.865         | 8.319          |
| D119    | 52.067                 | 41.019                | —                | 125.971         | 8.544          |
| P120    | 63.490                 | 32.200                | 176.915          | —               | —              |
| D121    | 54.491                 | 40.793                | 176.114          | 119.298         | 8.406          |
| N122    | 53.466                 | 39.273                | 175.372          | 119.186         | 8.154          |
| E123    | 56.754                 | 29.919                | 176.029          | 121.643         | 8.384          |
| A124    | 52.364                 | 19.130                | 177.208          | 124.486         | 8.246          |
| Y125    | 57.743                 | 38.995                | 175.349          | 119.934         | 8.052          |
| E126    | 55.605                 | 30.563                | 175.414          | 123.669         | 8.151          |
| M127    | 53.304                 | 32.351                | —                | 123.881         | 8.440          |
| P128    | 63.061                 | 32.197                | 176.888          | —               | —              |
| S129    | 58.275                 | 63.903                | 174.803          | 116.753         | 8.503          |
| E130    | 56.464                 | 30.202                | 176.493          | 123.190         | 8.592          |
| E131    | 56.840                 | 30.160                | 176.924          | 121.925         | 8.486          |
| G132    | 45.165                 | —                     | 173.820          | 110.009         | 8.429          |
| Y133    | 58.128                 | 38.783                | 175.724          | 120.331         | 8.089          |
| Q134    | 55.407                 | 29.837                | 174.843          | 122.778         | 8.245          |
| D135    | 54.151                 | 41.034                | 175.447          | 121.697         | 8.267          |
| Y136    | 57.599                 | 39.064                | 175.073          | 120.719         | 8.080          |
| E137    | 53.515                 | 30.030                | —                | 125.324         | 8.261          |
| P138    | 62.910                 | 32.228                | 176.852          | —               | —              |
| E139    | 56.511                 | 30.207                | 175.366          | 121.578         | 8.535          |
| A140    | 53.798                 | 20.177                | —                | 130.926         | 8.023          |

**Table S3.** Chemical shifts predicted based on Kjaergaard *et al* for non-acetylated WT aS at 15 °C and pH 6.

| Residue | $^{13}\text{C}^\alpha$ | $^{13}\text{C}^\beta$ | $^{13}\text{C}'$ | $^{15}\text{N}$ | $^1\text{H}^\text{N}$ | $^1\text{H}^\alpha$ |
|---------|------------------------|-----------------------|------------------|-----------------|-----------------------|---------------------|
| M1      | 55.566                 | 32.807                | 175.880          | 122.254         | 8.541                 | 4.475               |
| D2      | 54.485                 | 40.819                | 176.139          | 122.197         | 8.429                 | 4.573               |
| V3      | 62.621                 | 32.670                | 175.882          | 120.960         | 8.152                 | 4.002               |
| F4      | 57.577                 | 39.309                | 175.648          | 123.327         | 8.140                 | 4.642               |
| M5      | 55.088                 | 32.874                | 175.728          | 123.231         | 8.299                 | 4.450               |
| K6      | 56.816                 | 32.925                | 176.920          | 123.349         | 8.383                 | 4.260               |
| G7      | 45.069                 | —                     | 174.198          | 110.570         | 8.474                 | 3.999               |
| L8      | 55.404                 | 42.415                | 177.763          | 122.256         | 8.150                 | 4.402               |
| S9      | 58.354                 | 63.543                | 174.626          | 116.575         | 8.391                 | 4.455               |
| K10     | 56.369                 | 33.123                | 176.396          | 123.692         | 8.384                 | 4.321               |
| A11     | 52.543                 | 19.043                | 177.724          | 125.488         | 8.252                 | 4.307               |
| K12     | 56.434                 | 33.102                | 176.746          | 121.356         | 8.408                 | 4.293               |
| E13     | 56.756                 | 30.209                | 176.919          | 122.621         | 8.475                 | 4.295               |
| G14     | 45.025                 | —                     | 174.021          | 110.529         | 8.490                 | 4.013               |
| V15     | 62.311                 | 32.814                | 176.426          | 120.833         | 8.094                 | 4.135               |
| V16     | 62.232                 | 32.744                | 175.948          | 125.266         | 8.369                 | 4.102               |
| A17     | 52.340                 | 19.175                | 177.509          | 129.477         | 8.510                 | 4.304               |
| A18     | 52.458                 | 19.200                | 177.674          | 124.413         | 8.369                 | 4.283               |
| A19     | 52.640                 | 19.168                | 177.973          | 123.340         | 8.295                 | 4.282               |
| E20     | 56.570                 | 30.290                | 176.646          | 120.389         | 8.424                 | 4.259               |
| K21     | 56.415                 | 33.149                | 176.810          | 123.047         | 8.450                 | 4.383               |
| T22     | 61.928                 | 69.839                | 174.553          | 116.389         | 8.205                 | 4.342               |
| K23     | 56.470                 | 33.379                | 176.507          | 124.522         | 8.505                 | 4.333               |
| Q24     | 56.069                 | 29.344                | 176.339          | 122.284         | 8.488                 | 4.343               |
| G25     | 45.149                 | —                     | 174.188          | 111.043         | 8.538                 | 4.014               |
| V26     | 62.372                 | 32.789                | 176.194          | 120.810         | 8.122                 | 4.103               |
| A27     | 52.554                 | 18.983                | 177.841          | 128.223         | 8.515                 | 4.332               |
| E28     | 56.545                 | 30.316                | 176.467          | 121.328         | 8.504                 | 4.237               |
| A29     | 52.481                 | 19.147                | 177.712          | 125.346         | 8.364                 | 4.310               |
| A30     | 52.785                 | 19.074                | 178.517          | 123.402         | 8.378                 | 4.302               |
| G31     | 45.126                 | —                     | 174.331          | 108.141         | 8.373                 | 3.970               |
| K32     | 56.458                 | 33.126                | 177.022          | 121.393         | 8.265                 | 4.397               |
| T33     | 61.957                 | 69.774                | 174.468          | 116.101         | 8.240                 | 4.362               |
| K34     | 56.457                 | 33.283                | 176.572          | 124.487         | 8.493                 | 4.342               |
| E35     | 56.799                 | 30.178                | 176.924          | 122.844         | 8.512                 | 4.285               |
| G36     | 45.204                 | —                     | 174.068          | 110.647         | 8.515                 | 3.997               |
| V37     | 62.495                 | 32.503                | 176.311          | 120.557         | 8.107                 | 4.043               |
| L38     | 55.126                 | 42.197                | 176.873          | 125.946         | 8.404                 | 4.311               |



**Table S3** (continued)

| Residue | $^{13}\text{C}^\alpha$ | $^{13}\text{C}^\beta$ | $^{13}\text{C}'$ | $^{15}\text{N}$ | $^1\text{H}^{\text{N}}$ | $^1\text{H}^\alpha$ |
|---------|------------------------|-----------------------|------------------|-----------------|-------------------------|---------------------|
| Y39     | 57.468                 | 38.631                | 175.502          | 121.953         | 8.226                   | 4.654               |
| V40     | 62.306                 | 32.697                | 176.241          | 122.978         | 8.028                   | 4.083               |
| G41     | 45.234                 | —                     | 174.290          | 113.386         | 8.411                   | 3.991               |
| S42     | 58.429                 | 63.821                | 174.879          | 116.187         | 8.299                   | 4.448               |
| K43     | 56.530                 | 32.942                | 176.857          | 123.455         | 8.521                   | 4.433               |
| T44     | 61.969                 | 69.846                | 174.423          | 115.926         | 8.107                   | 4.350               |
| K45     | 56.457                 | 33.283                | 176.572          | 124.487         | 8.493                   | 4.342               |
| E46     | 56.799                 | 30.178                | 176.924          | 122.844         | 8.512                   | 4.285               |
| G47     | 45.025                 | —                     | 174.021          | 110.529         | 8.490                   | 4.013               |
| V48     | 62.282                 | 32.785                | 176.399          | 120.764         | 8.087                   | 4.112               |
| V49     | 62.295                 | 32.685                | 175.969          | 124.782         | 8.409                   | 4.091               |
| H50     | 55.392                 | 29.436                | 174.672          | 123.584         | 8.714                   | 4.709               |
| G51     | 45.025                 | —                     | 174.017          | 111.474         | 8.447                   | 4.016               |
| V52     | 62.480                 | 32.819                | 176.265          | 120.723         | 8.138                   | 4.087               |
| A53     | 52.392                 | 19.084                | 177.802          | 128.404         | 8.531                   | 4.428               |
| T54     | 61.816                 | 70.033                | 174.537          | 115.013         | 8.231                   | 4.363               |
| V55     | 62.319                 | 33.075                | 175.875          | 123.568         | 8.240                   | 4.123               |
| A56     | 52.547                 | 19.093                | 177.770          | 128.642         | 8.475                   | 4.305               |
| E57     | 56.553                 | 30.310                | 176.624          | 121.232         | 8.517                   | 4.249               |
| K58     | 56.415                 | 33.149                | 176.810          | 123.047         | 8.450                   | 4.383               |
| T59     | 61.903                 | 69.837                | 174.467          | 116.407         | 8.205                   | 4.352               |
| K60     | 56.516                 | 33.294                | 176.580          | 124.511         | 8.486                   | 4.328               |
| E61     | 56.667                 | 30.306                | 176.378          | 122.887         | 8.480                   | 4.253               |
| Q62     | 55.827                 | 29.495                | 175.936          | 122.276         | 8.545                   | 4.369               |
| V63     | 62.476                 | 32.755                | 176.531          | 122.792         | 8.365                   | 4.183               |
| T64     | 61.891                 | 69.861                | 174.009          | 118.803         | 8.385                   | 4.376               |
| N65     | 53.086                 | 38.981                | 175.178          | 121.742         | 8.587                   | 4.752               |
| V66     | 62.826                 | 32.628                | 176.819          | 121.434         | 8.370                   | 4.118               |
| G67     | 45.363                 | —                     | 174.763          | 112.585         | 8.548                   | 4.019               |
| G68     | 45.096                 | —                     | 174.135          | 109.162         | 8.321                   | 3.974               |
| A69     | 52.456                 | 19.086                | 177.907          | 123.578         | 8.224                   | 4.363               |
| V70     | 62.282                 | 32.820                | 176.295          | 120.340         | 8.235                   | 4.126               |
| V71     | 62.195                 | 32.846                | 176.293          | 125.563         | 8.372                   | 4.219               |
| T72     | 61.966                 | 69.949                | 174.768          | 119.650         | 8.407                   | 4.380               |
| G73     | 45.038                 | —                     | 174.117          | 112.364         | 8.547                   | 4.054               |
| V74     | 62.509                 | 32.840                | 176.621          | 120.897         | 8.152                   | 4.187               |
| T75     | 61.749                 | 69.883                | 174.127          | 118.755         | 8.319                   | 4.363               |
| A76     | 52.413                 | 19.410                | 177.664          | 127.706         | 8.461                   | 4.369               |

**Table S3** (continued)

| Residue | $^{13}\text{C}^\alpha$ | $^{13}\text{C}^\beta$ | $^{13}\text{C}'$ | $^{15}\text{N}$ | $^1\text{H}^{\text{N}}$ | $^1\text{H}^\alpha$ |
|---------|------------------------|-----------------------|------------------|-----------------|-------------------------|---------------------|
| V77     | 62.364                 | 32.865                | 176.140          | 120.642         | 8.192                   | 4.054               |
| A78     | 52.517                 | 19.220                | 177.700          | 128.455         | 8.451                   | 4.306               |
| Q79     | 55.823                 | 29.476                | 176.039          | 120.672         | 8.493                   | 4.307               |
| K80     | 56.359                 | 33.128                | 176.655          | 123.436         | 8.447                   | 4.392               |
| T81     | 61.802                 | 69.878                | 174.381          | 116.796         | 8.235                   | 4.402               |
| V82     | 62.469                 | 33.044                | 176.154          | 123.729         | 8.340                   | 4.132               |
| E83     | 56.757                 | 30.142                | 177.013          | 125.604         | 8.659                   | 4.304               |
| G84     | 45.089                 | —                     | 174.125          | 110.871         | 8.542                   | 3.977               |
| A85     | 52.874                 | 18.751                | 178.755          | 123.611         | 8.284                   | 4.347               |
| G86     | 45.235                 | —                     | 174.361          | 107.955         | 8.394                   | 4.031               |
| S87     | 58.324                 | 63.769                | 174.812          | 115.548         | 8.202                   | 4.483               |
| I88     | 61.182                 | 38.559                | 176.192          | 123.293         | 8.303                   | 4.182               |
| A89     | 52.418                 | 19.069                | 177.495          | 128.559         | 8.343                   | 4.314               |
| A90     | 52.483                 | 19.262                | 177.715          | 124.390         | 8.356                   | 4.280               |
| A91     | 52.510                 | 19.176                | 178.148          | 123.616         | 8.350                   | 4.405               |
| T92     | 62.382                 | 69.821                | 175.064          | 114.018         | 8.188                   | 4.292               |
| G93     | 45.191                 | —                     | 173.657          | 110.700         | 8.420                   | 3.953               |
| F94     | 57.569                 | 39.558                | 175.759          | 119.790         | 8.089                   | 4.685               |
| V95     | 62.155                 | 32.811                | 175.675          | 122.511         | 8.071                   | 4.049               |
| K96     | 56.260                 | 32.972                | 176.515          | 126.345         | 8.415                   | 4.271               |
| K97     | 56.497                 | 33.117                | 176.331          | 124.248         | 8.470                   | 4.286               |
| D98     | 54.648                 | 41.137                | 176.195          | 122.081         | 8.424                   | 4.556               |
| Q99     | 55.934                 | 29.095                | 176.073          | 120.821         | 8.450                   | 4.339               |
| L100    | 55.636                 | 42.105                | 178.166          | 122.959         | 8.333                   | 4.337               |
| G101    | 45.073                 | —                     | 174.201          | 109.943         | 8.458                   | 3.992               |
| K102    | 56.532                 | 33.058                | 176.545          | 121.051         | 8.273                   | 4.332               |
| N103    | 53.391                 | 38.550                | 175.355          | 119.624         | 8.514                   | 4.693               |
| E104    | 56.927                 | 30.099                | 176.685          | 121.661         | 8.616                   | 4.284               |
| E105    | 56.983                 | 30.061                | 177.224          | 121.571         | 8.536                   | 4.288               |
| G106    | 44.959                 | —                     | 173.990          | 110.031         | 8.456                   | 3.984               |
| A107    | 50.490                 | 18.421                | 176.166          | 125.078         | 8.238                   | 4.614               |
| P108    | 63.207                 | 32.162                | 177.028          | —               | —                       | 4.437               |
| Q109    | 55.927                 | 29.411                | 176.219          | 120.945         | 8.600                   | 4.318               |
| E110    | 56.826                 | 30.268                | 176.874          | 122.606         | 8.593                   | 4.296               |
| G111    | 45.128                 | —                     | 174.055          | 110.408         | 8.519                   | 3.993               |
| I112    | 61.043                 | 38.480                | 176.475          | 121.017         | 8.119                   | 4.173               |
| L113    | 55.188                 | 42.137                | 177.474          | 126.768         | 8.429                   | 4.393               |
| E114    | 56.711                 | 30.217                | 176.111          | 122.834         | 8.538                   | 4.257               |

**Table S3** (continued)

| Residue | $^{13}\text{C}^\alpha$ | $^{13}\text{C}^\beta$ | $^{13}\text{C}'$ | $^{15}\text{N}$ | $^1\text{H}^{\text{N}}$ | $^1\text{H}^\alpha$ |
|---------|------------------------|-----------------------|------------------|-----------------|-------------------------|---------------------|
| D115    | 54.229                 | 41.144                | 176.240          | 121.033         | 8.239                   | 4.604               |
| M116    | 53.355                 | 32.028                | 174.332          | 122.174         | 8.342                   | 4.763               |
| P117    | 63.078                 | 31.961                | 177.020          | —               | —                       | 4.488               |
| V118    | 62.326                 | 33.110                | 175.851          | 121.601         | 8.408                   | 4.071               |
| D119    | 52.094                 | 40.404                | 174.284          | 125.942         | 8.515                   | 4.926               |
| P120    | 63.388                 | 32.091                | 176.879          | —               | —                       | 4.422               |
| D121    | 54.679                 | 40.826                | 176.423          | 119.452         | 8.515                   | 4.558               |
| N122    | 53.492                 | 38.618                | 175.471          | 118.413         | 8.411                   | 4.672               |
| E123    | 57.066                 | 29.861                | 176.529          | 120.891         | 8.471                   | 4.182               |
| A124    | 52.760                 | 18.926                | 177.547          | 124.298         | 8.349                   | 4.252               |
| Y125    | 57.840                 | 38.697                | 175.753          | 119.303         | 8.163                   | 4.569               |
| E126    | 56.155                 | 30.386                | 175.874          | 122.851         | 8.065                   | 4.249               |
| M127    | 53.447                 | 31.826                | 174.376          | 123.249         | 8.387                   | 4.721               |
| P128    | 63.166                 | 32.073                | 176.990          | —               | —                       | 4.522               |
| S129    | 58.480                 | 63.834                | 174.811          | 116.562         | 8.555                   | 4.428               |
| E130    | 56.723                 | 30.164                | 176.617          | 122.871         | 8.564                   | 4.337               |
| E131    | 57.103                 | 30.022                | 177.081          | 121.908         | 8.488                   | 4.228               |
| G132    | 45.317                 | —                     | 174.061          | 109.580         | 8.496                   | 3.922               |
| Y133    | 57.913                 | 38.699                | 176.019          | 119.483         | 8.080                   | 4.617               |
| Q134    | 55.976                 | 29.299                | 175.175          | 122.360         | 8.291                   | 4.234               |
| D135    | 54.692                 | 40.771                | 176.054          | 121.210         | 8.338                   | 4.478               |
| Y136    | 57.785                 | 38.632                | 175.676          | 120.134         | 8.135                   | 4.609               |
| E137    | 54.307                 | 29.518                | 174.158          | 123.643         | 8.206                   | 4.522               |
| P138    | 63.314                 | 32.073                | 177.017          | —               | —                       | 4.379               |
| E139    | 56.573                 | 30.241                | 176.629          | 121.775         | 8.631                   | 4.232               |
| A140    | 52.665                 | 19.256                | 177.827          | 125.355         | 8.435                   | 4.305               |

**Table S4.**  $^3J_{\text{HN-H}\alpha}$  couplings for the N-terminal residues of acetylated and non-acetylated aS. Measurements were performed at 900 MHz, 15 °C, pH 6.0 on uniformly  $^{15}\text{N}$ -labeled protein. Average  $^3J_{\text{HN-H}\alpha}$  values and their standard deviations for corresponding residue types, obtained from measurements on non-acetylated aS, are also shown.

| Residue | Non-acetylated aS |             | Acetylated aS |             | Residue-type average |        |
|---------|-------------------|-------------|---------------|-------------|----------------------|--------|
|         | J, Hz             | uncertainty | J, Hz         | uncertainty | J, Hz                | SD, Hz |
| M1      | —                 | —           | 6.50          | 0.02        | 6.97                 | 0.31   |
| D2      | —                 | —           | 6.63          | 0.04        | 6.89                 | 0.02   |
| V3      | 7.25              | 0.04        | 6.66          | 0.08        | 7.60                 | 0.29   |
| F4      | 7.13              | 0.03        | 6.76          | 0.03        | 7.02                 | 0.14   |
| M5      | 7.13              | 0.06        | 6.69          | 0.06        | 6.97                 | 0.31   |
| K6      | 6.11              | 0.07        | 6.07          | 0.05        | 6.66                 | 0.25   |
| L8      | 7.01              | 0.03        | 6.87          | 0.05        | 7.00                 | 0.15   |
| S9      | 6.53              | 0.07        | 6.52          | 0.04        | 6.62                 | 0.15   |
| K10     | —                 | —           | 6.85          | 0.08        | 6.66                 | 0.25   |
| A11     | 5.30              | 0.05        | —             | —           | 5.64                 | 0.26   |
| K12     | 6.64              | 0.03        | 6.65          | 0.02        | 6.66                 | 0.25   |
| E13     | 6.18              | 0.02        | —             | —           | 6.52                 | 0.42   |
| V15     | 7.37              | 0.07        | 7.47          | 0.06        | 7.60                 | 0.29   |

## Reference

1. Kjaergaard, M., Brander, S., and Poulsen, F. M. Random coil chemical shift for intrinsically disordered proteins: effects of temperature and pH, *J. Biomol. NMR* 49, 139-149.
